# Supplementary material
Source: Springer Nature journal article supplement (https://www.springermedizin.de/resource/supplementary/13045_2014_400_MOESM2_ESM.pdf/9661292)
Supplement: MOESM2 [file 9661292]

**Additional file 2- Differentially expressed miRNAs during mouse and human granulopoiesis**

| mirName    | Log2 fold change                 |                                  |
|------------|----------------------------------|----------------------------------|
|            | Mouse Granulocytes/Promyelocytes | Human Neutrophils/ Promyelocytes |
| miR-340-3p | 7.864745056                      | 1.515309558                      |
| miR-103    | 4.513979917                      | 1.664124317                      |
| mir-16     | 6.556382392                      | 1.772799189                      |
| miR-328    | 3.130297986                      | 2.057627912                      |
| miR-142-5p | 4.517422967                      | 2.191668985                      |
| miR-30e*   | 2.878066645                      | 2.23186548                       |
| miR-191    | 1.610155475                      | 2.234967588                      |
| miR-30c    | 4.815214279                      | 2.312079819                      |
| miR-140    | 5.089062819                      | 2.48983193                       |
| miR-24     | 4.184049733                      | 2.573760883                      |
| miR-26a    | 6.222955804                      | 2.631301474                      |
| miR-29a    | 2.469467531                      | 2.68887123                       |
| miR-26b    | 9.380078523                      | 2.731264635                      |
| miR-194    | 14.71280074                      | 3.120518819                      |
| miR-28     | 11.68106573                      | 3.283802928                      |
| miR-192    | 4.45399519                       | 3.35832866                       |
| miR-200c   | 10.59197708                      | 4.322648347                      |
| miR-223    | 8.046157621                      | 7.709056419                      |
| miR-22     | 26.66915113                      | 13.16081157                      |
| miR-365    | 27.15413497                      | 15.87356324                      |
| miR-93     | 1.95152237                       | 1.027918233                      |
| miR-186    | 2.716595943                      | 1.05823379                       |
| miR-142-3p | 4.846018794                      | 1.172857653                      |
| miR-27a    | 3.408648887                      | 1.178209217                      |
| miR-30b    | 5.662738857                      | 1.18580465                       |
| miR-484    | 4.412511383                      | 1.264940287                      |
| miR-195    | 5.906485714                      | 1.318294542                      |
| miR-331    | 1.756495645                      | 1.340397394                      |

|             |             |              |
|-------------|-------------|--------------|
| miR-15a     | 9.003587743 | 1.445926236  |
| miR-15b     | 6.524647677 | 1.461865306  |
| miR-146a    | 2.614255233 | -6.773903349 |
| miR-532-5p  | 5.419651181 | -1.987091608 |
| miR-30e     | 2.725838333 | -1.694185756 |
| let-29c     | 5.145459791 | -1.539582981 |
| miR-148a    | 2.121081418 | -1.346824433 |
| miR-30a     | 2.859969973 | -1.345211124 |
| miR-25      | 1.975064817 | -1.226034789 |
| let-7g      | 2.414626421 | -1.194142681 |
| miR-30d     | 2.848297813 | -1.169371932 |
| miR-106b    | 2.812396492 | -1.12121046  |
| miR-342     | 2.131989008 | -1.112327048 |
| miR-27a*    | 1.637051831 | NA           |
| mmu-miR-93* | 1.732793817 | NA           |
| miR-135a*   | 1.810138391 | NA           |
| miR-30a*    | 1.893558509 | NA           |
| miR-15b*    | 2.528181431 | NA           |
| miR-425     | 2.599979053 | NA           |
| miR-149     | 2.630067817 | NA           |
| miR-467a*   | 2.637370031 | NA           |
| miR-106b*   | 2.7379574   | NA           |
| miR-297a*   | 2.81883689  | NA           |
| miR-301b    | 2.942005615 | NA           |
| miR-15a*    | 3.095344533 | NA           |
| miR-467b*   | 3.347536996 | NA           |
| miR-16*     | 3.387216025 | NA           |
| miR-301a    | 3.905480345 | NA           |
| miR-532-3p  | 4.410370938 | NA           |
| miR-744     | 4.514605731 | NA           |
| miR-467a    | 4.532477945 | NA           |
| miR-467c    | 4.620022892 | NA           |

|              |              |              |
|--------------|--------------|--------------|
| miR-652      | 5.072510689  | NA           |
| miR-574-3p   | 5.119844524  | NA           |
| miR-503*     | 5.169769651  | NA           |
| miR-322      | 5.666272559  | NA           |
| miR-340-5p   | 6.738838728  | NA           |
| miR-150      | 7.448758559  | NA           |
| miR-503      | 7.650213443  | NA           |
| miR-24-2*    | 9.126742323  | NA           |
| miR-26b*     | 9.487973629  | NA           |
| miR-296-5p   | 11.4414659   | NA           |
| miR-10b      | 12.47614223  | NA           |
| miR-322*     | 16.32600614  | NA           |
| miR-350      | 17.33240563  | NA           |
| mmu-miR-744* | 26.98526594  | NA           |
| miR-135b     | 47.51463362  | NA           |
| miR-135a     | 60.18783426  | NA           |
| miR-139-5p   | 73.05443733  | NA           |
| miR-139-3p   | 2138.672706  | NA           |
| miR-126-5p   | -1.960198831 | -22.80236717 |
| miR-20b      | -2.249493191 | -13.56125758 |
| miR-130a     | -5.689098264 | -12.93423522 |
| let-7c       | -1.702907415 | -9.102439167 |
| miR-155      | -6.902887633 | -7.949832811 |
| miR-20a      | -2.315140902 | -7.759839992 |
| miR-19a      | -1.653588201 | -6.596542701 |
| miR-196b     | -15.32165249 | -3.928087531 |
| miR-18a      | -1.987424424 | -3.914393014 |
| miR-92a      | -1.72931418  | -3.705826699 |
| miR-17       | -1.644786126 | -2.457491124 |
| miR-27b      | -1.627322285 | -2.128841834 |
| miR-320      | -2.157409437 | -2.072202536 |
| miR-378      | -2.995714215 | -1.90503698  |

|              |              |              |
|--------------|--------------|--------------|
| let-7a       | -1.793030464 | -1.87949398  |
| miR-130b     | -1.495885758 | -1.804123467 |
| let-7d       | -1.752968413 | -1.385763516 |
| miR-101a     | -2.068521568 | -1.195559684 |
| miR-19b      | -1.184764239 | -5.345866277 |
| miR-221      | -1.419516875 | -5.295218656 |
| miR-222      | -1.406100779 | -3.266964674 |
| miR-98       | -1.248676708 | -2.721152219 |
| miR-374      | -1.398519141 | -1.110383952 |
| mmu-miR-801  | -40.52948673 | NA           |
| mmu-miR-805  | -37.39827961 | NA           |
| miR-101b     | -2.56845358  | NA           |
| miR-106a     | -1.711901863 | NA           |
| miR-203      | -1.684359393 | NA           |
| mmu-miR-706  | -1.569059433 | NA           |
| miR-181a     | -1.568298305 | NA           |
| mmu-miR-877* | -1.435844982 | NA           |
| let-7i       | -1.409223072 | NA           |
| miR-130b*    | -1.220015942 | NA           |
| mmu-miR-699  | -1.121865716 | NA           |
| let-7e       | -1.052485239 | NA           |
| miR-425*     | -1.435844982 | NA           |

---

Key: NA- Not assessible

in red- miRNAs upregulated during mouse granulopoiesis

in green- miRNAs downregulated during mouse granulopoiesis
